# Supplementary material
Source: PubMed Central journal article supplement (PMC5833503)
Supplement: jamainternmed-178-39-s001.pdf [file jamainternmed-178-39-s001.pdf]

## Supplementary Online Content

Valencia V, Arora VM, Ranji SR, Meza C, Moriates C. A comparison of laboratory testing in teaching vs nonteaching hospitals for 2 common medical conditions.

*JAMA Intern Med.* Published online November 13, 2017.

doi:10.1001/jamainternmed.2017.6032

**eTable 1.** Mean Length of Stay by Hospital Teaching Status and Mean Laboratory Tests Per Day By Illness Severity Category and Hospital Teaching Status for Sensitivity Analyses

**eTable 2.** Cellulitis Generalized Mixed Linear Regression Results for Main Adjusted Model

**eTable 3.** Bacterial Pneumonia Generalized Mixed Linear Regression Results for Main Adjusted Model

This supplementary material has been provided by the authors to give readers additional information about their work.

**eTable 1.** Mean Length of Stay by Hospital Teaching Status and Mean Laboratory Tests Per Day By Illness Severity Category and Hospital Teaching Status for Sensitivity Analyses

|                                                                        | Major Teaching<br>(N=11) | Minor Teaching<br>(N=12) | Non-teaching<br>(N=73) | P Value* |
|------------------------------------------------------------------------|--------------------------|--------------------------|------------------------|----------|
| <b>Excluding patients requiring many labs</b>                          |                          |                          |                        |          |
| <b>Bacterial Pneumonia</b>                                             |                          |                          |                        |          |
| Mean (SD) LOS                                                          | 3.63 (3.54, 3.72)        | 3.7 (3.62, 3.78)         | 3.67 (3.63, 3.71)      | .56      |
| Mean Labs Per Day                                                      | 12.69 (12.3, 13.08)      | 9.35 (9.10, 9.60)        | 8.71 (8.61, 8.81)      | <.001    |
| Illness Severity 1                                                     | 11.69 (10.81, 12.57)     | 9.4 (8.75, 10.05)        | 8.61 (8.37, 8.85)      | <.001    |
| Illness Severity 2                                                     | 12.84 (12.3, 13.38)      | 9.4 (9.06, 9.74)         | 8.82 (8.68, 8.96)      | <.001    |
| Illness Severity 3                                                     | 12.8 (12.1, 13.50)       | 9.15 (8.65, 9.65)        | 8.56 (8.38, 8.74)      | <.001    |
| Illness Severity 4                                                     | 14.17 (11.46, 16.88)     | 10.15 (8.33, 11.97)      | 8.51 (7.68, 9.34)      | <.001    |
| <b>Cellulitis</b>                                                      |                          |                          |                        |          |
| Mean (SD) LOS                                                          | 3.54 (3.46, 3.62)        | 3.51 (3.43, 3.59)        | 3.56 (3.53, 3.59)      | .57      |
| Mean Labs Per Day                                                      | 9.97 (9.67, 10.27)       | 8.15 (7.91, 8.39)        | 7.02 (6.94, 7.10)      | <.001    |
| Illness Severity 1                                                     | 9.02 (8.55, 9.49)        | 7.47 (7.14, 7.80)        | 6.54 (6.41, 6.67)      | <.001    |
| Illness Severity 2                                                     | 10.26 (9.85, 10.67)      | 8.61 (8.25, 8.97)        | 7.2 (7.08, 7.32)       | <.001    |
| Illness Severity 3                                                     | 11.22 (10.19, 12.25)     | 8.56 (7.76, 9.36)        | 7.85 (7.55, 8.15)      | <.001    |
| Illness Severity 4                                                     | 13.29 (7.69, 18.89)      | 11.12 (0.04, 22.2)       | 8.09 (6.64, 9.54)      | .03      |
| <b>Excluding hospitalizations from major teaching hospital outlier</b> |                          |                          |                        |          |
| <b>Bacterial Pneumonia</b>                                             |                          |                          |                        |          |
| Mean (SD) LOS                                                          | 3.93 (3.86, 4.00)        | 3.92 (3.85, 3.99)        | 3.91 (3.88, 3.94)      | .65      |
| Mean Labs Per Day                                                      | 11.25 (11.02, 11.48)     | 9.48 (9.28, 9.68)        | 8.92 (8.84, 9.00)      | <.001    |
| Illness Severity 1                                                     | 10.51 (9.82, 11.20)      | 9.3 (8.68, 9.92)         | 8.6 (8.37, 8.83)       | <.001    |
| Illness Severity 2                                                     | 10.98 (10.63, 11.33)     | 9.39 (9.11, 9.67)        | 8.9 (8.78, 9.02)       | <.001    |
| Illness Severity 3                                                     | 11.68 (11.31, 12.05)     | 9.58 (9.25, 9.91)        | 9 (8.87, 9.13)         | <.001    |
| Illness Severity 4                                                     | 11.45 (10.50, 12.40)     | 10.17 (9.05, 11.29)      | 9.39 (8.92, 9.86)      | <.001    |
| <b>Cellulitis</b>                                                      |                          |                          |                        |          |
| Mean (SD) LOS                                                          | 3.76 (3.69, 3.83)        | 3.71 (3.63, 3.79)        | 3.75 (3.72, 3.78)      | .59      |
| Mean Labs Per Day                                                      | 9.18 (8.96, 9.40)        | 8.3 (8.09, 8.51)         | 7.29 (7.22, 7.36)      | <.001    |
| Illness Severity 1                                                     | 8.09 (7.70, 8.48)        | 7.46 (7.14, 7.78)        | 6.56 (6.44, 6.68)      | <.001    |
| Illness Severity 2                                                     | 9.23 (8.92, 9.54)        | 8.55 (8.25, 8.85)        | 7.37 (7.26, 7.48)      | <.001    |
| Illness Severity 3                                                     | 10.26 (9.74, 10.78)      | 9.08 (8.53, 9.63)        | 8.19 (8.01, 8.37)      | <.001    |
| Illness Severity 4                                                     | 10.82 (9.45, 12.19)      | 9.66 (6.90, 12.42)       | 9.42 (8.03, 10.81)     | .42      |

| <b>eTable 2. Cellulitis Generalized Mixed Linear Regression Results for Main Adjusted Model</b> |           |                |               |        |       |         |
|-------------------------------------------------------------------------------------------------|-----------|----------------|---------------|--------|-------|---------|
|                                                                                                 | Estimate  | Standard Error | Relative rate | 95% CI |       | P Value |
| (Intercept)                                                                                     | 2.27      | 0.03           | 9.68          | 9.21   | 10.28 | <.001   |
| <b>Hospital Type-Non-teaching</b>                                                               | Reference |                |               |        |       |         |
| Major Teaching                                                                                  | 0.30      | 0.07           | 1.35          | 1.19   | 1.54  | <.001   |
| Minor Teaching                                                                                  | 0.14      | 0.06           | 1.15          | 1.01   | 1.30  | .03     |
| <b>Illness Severity 1</b>                                                                       | Reference |                |               |        |       |         |
| 2                                                                                               | 0.21      | 0.01           | 1.23          | 1.21   | 1.25  | <.001   |
| 3                                                                                               | 0.43      | 0.01           | 1.54          | 1.51   | 1.57  | <.001   |
| 4                                                                                               | 0.63      | 0.01           | 1.88          | 1.73   | 2.03  | <.001   |
| <b>Age Group 18-34</b>                                                                          | Reference |                |               |        |       |         |
| 35-54                                                                                           | 0.07      | 0.01           | 1.08          | 1.05   | 1.09  | <.001   |
| 55-74                                                                                           | 0.09      | 0.01           | 1.09          | 1.06   | 1.12  | <.001   |
| 75+                                                                                             | -0.02     | 0.01           | 0.99          | 0.96   | 1.01  | .29     |
| <b>Gender Female</b>                                                                            | Reference |                |               |        |       |         |
| Male                                                                                            | 0.00      | 0.00           | 1.00          | 0.99   | 1.01  | .92     |
| <b>Race- White</b>                                                                              | Reference |                |               |        |       |         |
| Asian or Pacific Islander                                                                       | 0.07      | 0.04           | 1.07          | 0.99   | 1.15  | .08     |
| Black                                                                                           | 0.06      | 0.01           | 1.06          | 1.04   | 1.09  | <.001   |
| Other                                                                                           | -0.01     | 0.01           | 0.99          | 0.96   | 1.01  | .25     |
| <b>Length of Stay</b>                                                                           | -0.14     | 0.00           | 0.87          | 0.86   | 0.87  | <.001   |
| <b>Ethnicity Hispanic</b>                                                                       | Reference |                |               |        |       |         |
| Not Hispanic                                                                                    | -0.75     | 0.01           | 0.47          | 0.90   | 0.95  | <.001   |
| <b>Payer-Private</b>                                                                            | Reference |                |               |        |       |         |
| Medicaid                                                                                        | 0.00      | 0.01           | 1.00          | 0.99   | 1.02  | .66     |
| Medicare                                                                                        | 0.01      | 0.01           | 1.01          | 0.98   | 1.03  | .58     |
| Military                                                                                        | 0.00      | 0.04           | 1.00          | 0.93   | 1.07  | .99     |
| Uninsured                                                                                       | 0.06      | 0.01           | 1.06          | 1.04   | 1.08  | <.001   |
| <b>Type of Admission-Emergency</b>                                                              | Reference |                |               |        |       |         |
| Urgent                                                                                          | -0.10     | 0.01           | 0.90          | 0.89   | 0.93  | <.001   |
| Direct                                                                                          | -0.11     | 0.01           | 0.90          | 0.88   | 0.92  | <.001   |
| <b>Discharge Disposition-Home</b>                                                               | Reference |                |               |        |       |         |
| Home with Home Health                                                                           | 0.10      | 0.01           | 1.11          | 1.08   | 1.12  | <.001   |
| Skilled Nursing Facility                                                                        | 0.06      | 0.02           | 1.06          | 1.03   | 1.09  | <.001   |
| Hospice                                                                                         | 0.10      | 0.08           | 1.11          | 0.95   | 1.28  | .20     |
| Other                                                                                           | 0.07      | 0.01           | 1.07          | 1.05   | 1.11  | <.001   |
| Deceased                                                                                        | 0.17      | 0.10           | 1.19          | 0.99   | 1.43  | .07     |

**eTable 3. Bacterial Pneumonia Generalized Mixed Linear Regression Results for Main**

| Adjusted Model                     |           |                |               |        |       |         |
|------------------------------------|-----------|----------------|---------------|--------|-------|---------|
|                                    | Estimate  | Standard Error | Relative rate | 95% CI |       | P Value |
| (Intercept)                        | 2.52      | 0.03           | 12.43         | 11.70  | 13.07 | <.001   |
| <b>Hospital Type-Non-teaching</b>  | Reference |                |               |        |       |         |
| Major Teaching                     | 0.34      | 0.06           | 1.40          | 1.25   | 1.57  | <.001   |
| Minor Teaching                     | 0.08      | 0.06           | 1.08          | 0.97   | 1.21  | .16     |
| <b>Illness Severity 1</b>          | Reference |                |               |        |       |         |
| 2                                  | 0.12      | 0.01           | 1.12          | 1.10   | 1.15  | <.001   |
| 3                                  | 0.26      | 0.01           | 1.30          | 1.28   | 1.33  | <.001   |
| 4                                  | 0.43      | 0.02           | 1.53          | 1.48   | 1.59  | <.001   |
| <b>Age Group 18-34</b>             | Reference |                |               |        |       |         |
| 35-54                              | 0.05      | 0.01           | 1.05          | 1.03   | 1.08  | <.001   |
| 55-74                              | 0.05      | 0.01           | 1.05          | 1.02   | 1.07  | <.001   |
| 75+                                | -0.04     | 0.01           | 0.96          | 0.94   | 0.99  | .01     |
| <b>Gender Female</b>               | Reference |                |               |        |       |         |
| Male                               | 0.04      | 0.01           | 1.04          | 1.03   | 1.05  | <.001   |
| <b>Race- White</b>                 | Reference |                |               |        |       |         |
| Asian or Pacific Islander          | 0.08      | 0.02           | 1.08          | 1.03   | 1.14  | .00     |
| Black                              | 0.05      | 0.01           | 1.05          | 1.03   | 1.06  | <.001   |
| Other                              | 0.00      | 0.01           | 1.00          | 0.98   | 1.02  | .87     |
| <b>Length of Stay</b>              | -0.13     | 0.00           | 0.88          | 0.87   | 0.88  | <.001   |
| <b>Ethnicity Hispanic</b>          | Reference |                |               |        |       |         |
| Not Hispanic                       | -0.05     | 0.01           | 0.95          | 0.93   | 0.97  | <.001   |
| <b>Payer-Private</b>               | Reference |                |               |        |       |         |
| Medicaid                           | 0.00      | 0.01           | 1.00          | 0.99   | 1.02  | .66     |
| Medicare                           | -0.02     | 0.01           | 0.98          | 0.95   | 1.00  | .08     |
| Military                           | -0.03     | 0.03           | 0.97          | 0.91   | 1.03  | .28     |
| Uninsured                          | 0.02      | 0.01           | 1.02          | 1.00   | 1.04  | .08     |
| <b>Type of Admission-Emergency</b> | Reference |                |               |        |       |         |
| Urgent                             | -0.11     | 0.01           | 0.90          | 0.87   | 0.91  | <.001   |
| Direct                             | -0.17     | 0.01           | 0.84          | 0.83   | 0.87  | <.001   |
| <b>Discharge Disposition-Home</b>  | Reference |                |               |        |       |         |
| Home with Home Health              | 0.00      | 0.01           | 1.00          | 0.98   | 1.02  | .87     |
| Skilled Nursing Facility           | -0.02     | 0.01           | 0.98          | 0.96   | 1.00  | .03     |
| Hospice                            | -0.05     | 0.02           | 0.95          | 0.91   | 1.00  | .04     |
| Other                              | 0.02      | 0.01           | 1.02          | 1.00   | 1.04  | .09     |
| Deceased                           | 0.10      | 0.03           | 1.11          | 1.04   | 1.17  | .00     |
